# Supplementary material for: CCT020312 Inhibits Triple-Negative Breast Cancer Through PERK Pathway-Mediated G1 Phase Cell Cycle Arrest and Apoptosis
Source: PubMed Central journal article supplement (PMC7250150; doi:10.3389/fphar.2020.00737), 2020-05-19
Supplement: Image_1.pdf [file Image_1.pdf]

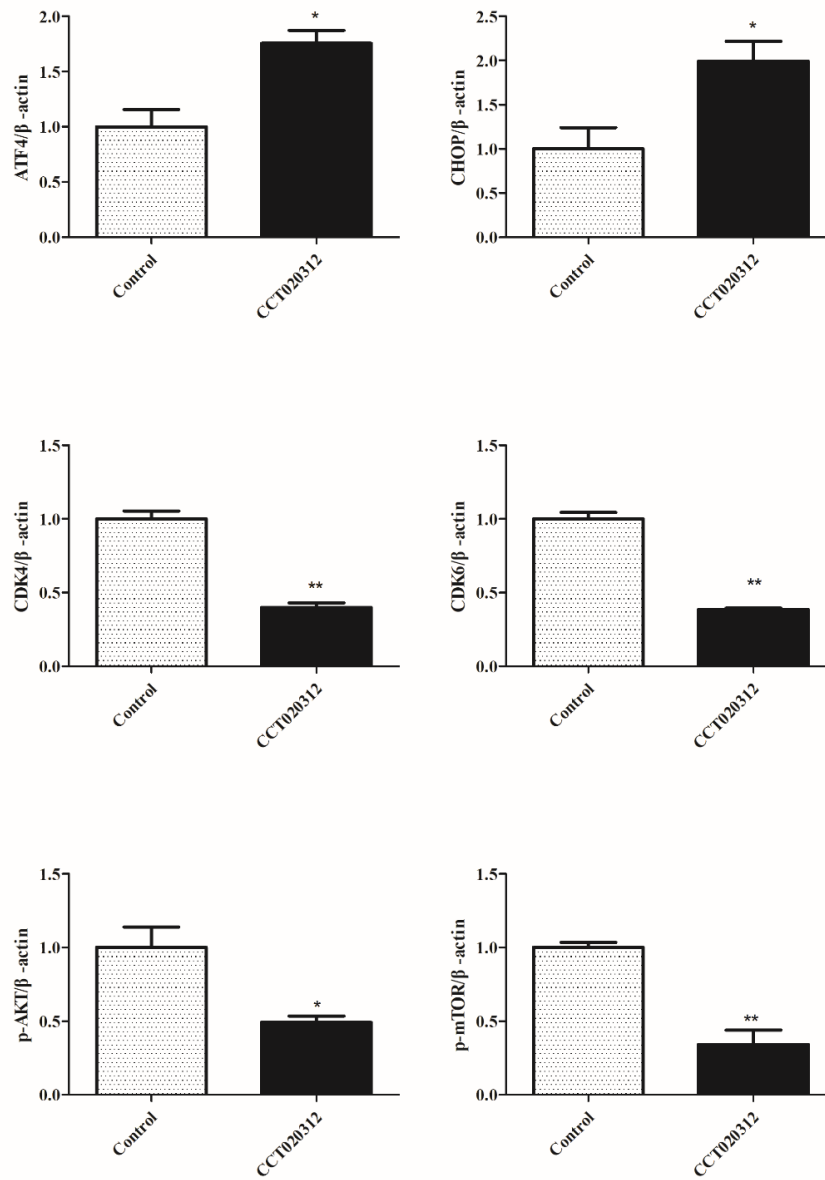

**Figure S1. CCT020312 inhibited tumor growth in an MDA-MB-453 cell orthotopic xenograft mouse model.** Representative tumor tissues from each group were prepared and subjected to Western Blotting assay. The relative protein expression was qualified by Tanon GIS software and data are presented as mean  $\pm$  SD (n=3), \* $p < 0.05$  or \*\* $p < 0.01$  vs. control.
